# Supplementary material for: Genetic Primary Microcephalies: When Centrosome Dysfunction Dictates Brain and Body Size
Source: MDPI journal article supplement (doi:10.3390/cells12131807), 2023-07-07
Supplement: s1 [file s1]

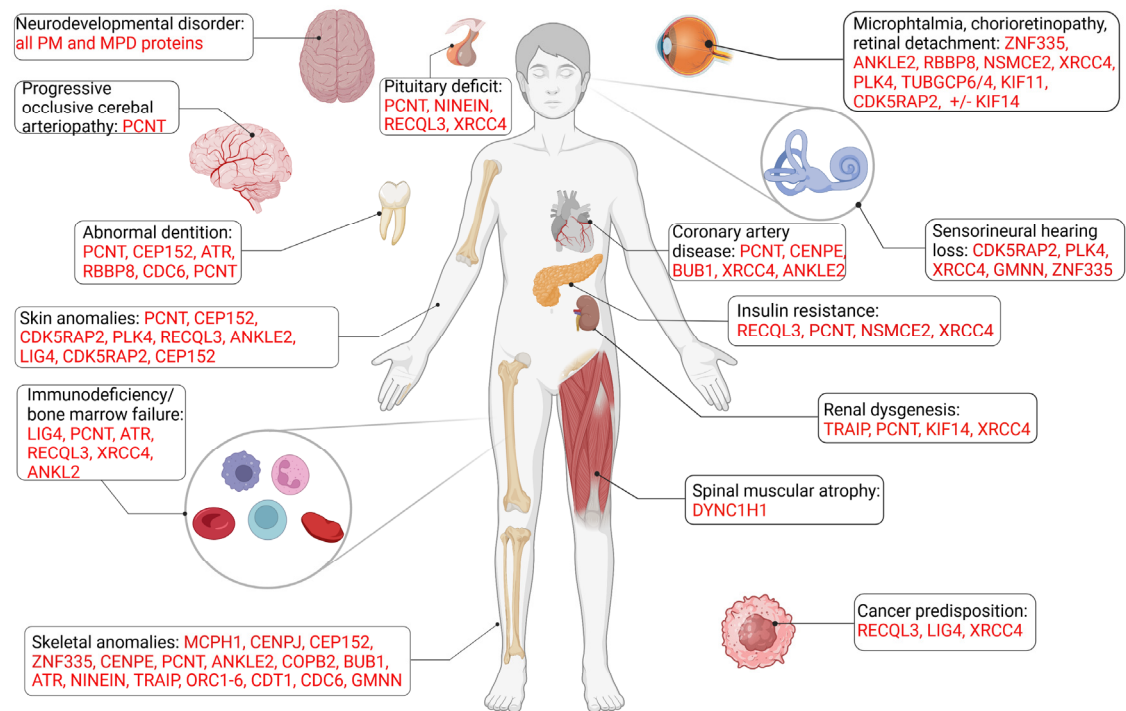

Figure S1

Figure S1: Affected organs related to mutations in PM and MPD genes (created with BioRender.com)
